# Supplementary material for: Functional polymorphisms in NR3C1 are associated with gastric cancer risk in Chinese population
Source: PubMed Central journal article supplement (PMC5739640; doi:10.18632/oncotarget.22172), 2017-10-27
Supplement: oncotarget-08-105312-s001.pdf [file oncotarget-08-105312-s001.pdf]

## Functional polymorphisms in *NR3C1* are associated with gastric cancer risk in Chinese population

### SUPPLEMENTARY MATERIALS

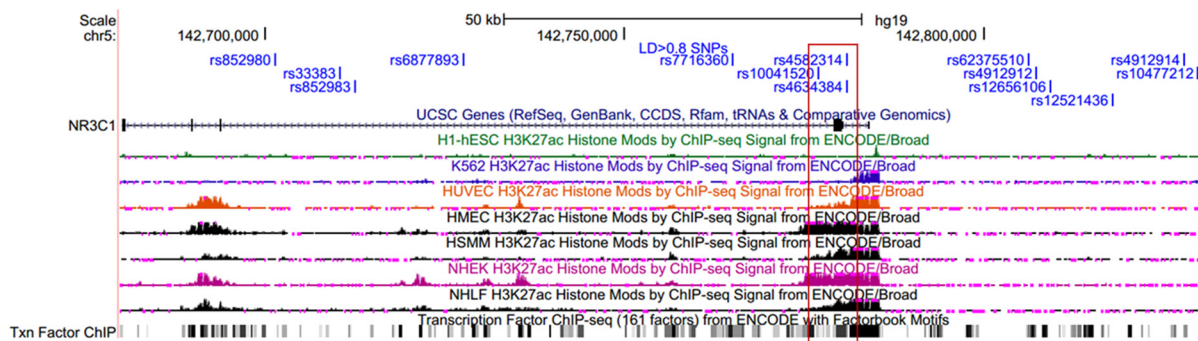

**Supplementary Figure 1: SNPs have strong linkage disequilibrium with the rs33388 in ENCODE project located on the promoter of *NR3C1*.** The SNPs (rs10041520, rs4582314 and rs4634384) have strong linkage disequilibrium ( $r^2 > 0.8$ ) with rs33388 are located on the promoters of *NR3C1* which were strongly modified by histone H3K27Ac. These regions were enriched with transcription binding sites, especially locations of rs4582314 and rs4634384 in ENCODE database.

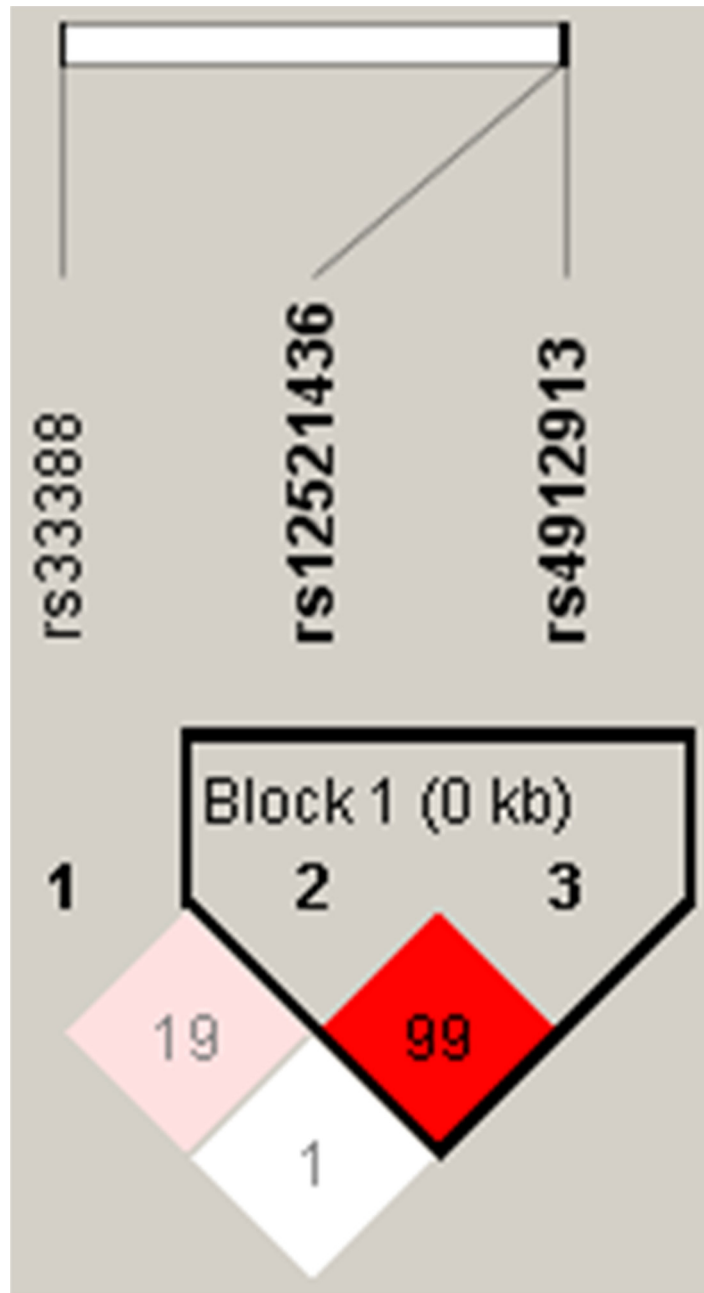

**Supplementary Figure 2:** Linkage disequilibrium blocks of the three SNPs were created based on the default algorithm is taken from Gabriel et al, Science, 2002, using HaploView software 4.2. The value of D' of each SNPs pair is shown in the crossing areas.

**Supplementary Table 1: Basic information of four selected SNPs in *NR3C1***

| SNP        | Location  | Major/Minor allele | MAF  | Call rate | HWE <sup>a</sup> | TFBS <sup>b</sup> | Splicing ESE/ESS <sup>b</sup> | Nearby Gene | <i>P</i> value <sup>c</sup> | FDR- <i>P</i> value <sup>d</sup> |
|------------|-----------|--------------------|------|-----------|------------------|-------------------|-------------------------------|-------------|-----------------------------|----------------------------------|
| rs4912913  | 5' near   | A/G                | 0.32 | 100%      | 0.62             | Y                 | --                            | LOC729123   | $5.75 \times 10^{-3}$       | $1.15 \times 10^{-2}$            |
| rs6194     | intron 12 | G/A                | 0.07 | 100%      | 0.59             | --                | Y                             | NR3C1       | 0.40                        | 0.40                             |
| rs12521436 | intron 15 | G/A                | 0.43 | 100%      | 0.11             | Y                 | --                            | LOC729123   | $3.12 \times 10^{-3}$       | $1.15 \times 10^{-2}$            |
| rs33388    | intron 15 | T/A                | 0.23 | 100%      | 0.18             | Y                 | --                            | NR3C1       | $1.64 \times 10^{-2}$       | $2.18 \times 10^{-2}$            |

<sup>a</sup> HWE: Hardy–Weinberg equilibrium. The *P* value for HWE was computed using the genotype data of controls;

<sup>b</sup> Functional annotation of 4 selected SNPs with SNPinfo (<http://snpinfo.nih.gov/cgi-bin/snpinfo/snpfunc.cgi>);

<sup>c</sup> The *P* value was computed using Plink1.07.

<sup>d</sup> The *P* value was adjusted by FDR using Plink1.07.

Supplementary Table 2: Characteristics of subjects included this study

| Variable               | Case (n=1,113) | Control(n=1848) | P value            |
|------------------------|----------------|-----------------|--------------------|
|                        | N (%)          | N (%)           |                    |
| <b>Age(mean±sd)</b>    | 61.02±10.51    | 60.76±12.05     | 0.544 <sup>a</sup> |
| <60                    | 466(41.87)     | 827(44.75)      | 0.135 <sup>b</sup> |
| ≥60                    | 647(58.13)     | 1021(55.25)     |                    |
| <b>Sex</b>             |                |                 |                    |
| Male                   | 839 (75.38)    | 1343(72.67)     | 0.115 <sup>b</sup> |
| Female                 | 274 (24.62)    | 505(27.33)      |                    |
| <b>Smoking status</b>  |                |                 |                    |
| Never                  | 578(51.93)     | 874(47.29)      | 0.016 <sup>b</sup> |
| Ever                   | 535(48.07)     | 974(52.71)      |                    |
| <b>Drinking status</b> |                |                 |                    |
| Never                  | 663(59.57)     | 1115(60.34)     | 0.709 <sup>b</sup> |
| Ever                   | 450(40.43)     | 733(39.66)      |                    |

<sup>a</sup> Welch's t-test was applied for the unequal variances;

<sup>b</sup> Two-sided Chi-square test.

**Supplementary Table 3: Stratified analyses of associations between rs33388, rs12521436, rs4912913 and gastric cancer risk**

| Variables              | rs33388(NR3C1, T/A)     |                       |                | rs12521436 (NR3C1, G/A) |                       |                | rs4912913(NR3C1, A/G)   |                       |                |
|------------------------|-------------------------|-----------------------|----------------|-------------------------|-----------------------|----------------|-------------------------|-----------------------|----------------|
|                        | OR (95%CI) <sup>a</sup> | P <sup>a</sup>        | P <sup>b</sup> | OR (95%CI) <sup>a</sup> | P <sup>a</sup>        | P <sup>b</sup> | OR (95%CI) <sup>a</sup> | P <sup>a</sup>        | P <sup>b</sup> |
| <b>Age (years)</b>     |                         |                       |                |                         |                       |                |                         |                       |                |
| <60                    | 0.81(0.65-0.99)         | 0.043                 | 0.552          | 0.99(0.84-1.18)         | 0.936                 | 0.016          | 0.99(0.83-1.19)         | 0.945                 | 0.012          |
| ≥60                    | 0.88(0.74-1.05)         | 0.159                 |                | 0.75(0.65-0.87)         | 1.35×10 <sup>-4</sup> |                | 1.35(1.15-1.59)         | 1.96×10 <sup>-4</sup> |                |
| <b>Sex</b>             |                         |                       |                |                         |                       |                |                         |                       |                |
| Male                   | 0.91(0.78-1.07)         | 0.250                 | 0.020          | 0.87(0.76-0.99)         | 0.038                 | 0.277          | 1.16(1.00-1.33)         | 0.043                 | 0.265          |
| Female                 | 0.61(0.45-0.83)         | 1.37×10 <sup>-3</sup> |                | 0.75(0.59-0.95)         | 0.016                 |                | 1.36(1.07-1.73)         | 0.013                 |                |
| <b>Smoking status</b>  |                         |                       |                |                         |                       |                |                         |                       |                |
| Never                  | 0.87(0.72-1.06)         | 0.176                 | 0.803          | 0.79(0.67-0.93)         | 3.82×10 <sup>-3</sup> | 0.263          | 1.24(1.04-1.47)         | 0.014                 | 0.741          |
| Ever                   | 0.84(0.69-1.02)         | 0.075                 |                | 0.90(0.76-1.06)         | 0.203                 |                | 1.19(1.00-1.42)         | 0.051                 |                |
| <b>Drinking status</b> |                         |                       |                |                         |                       |                |                         |                       |                |
| Never                  | 0.84(0.70-0.99)         | 0.043                 | 0.620          | 0.82(0.71-0.95)         | 6.95×10 <sup>-3</sup> | 0.544          | 1.24(1.07-1.45)         | 5.70×10 <sup>-3</sup> | 0.454          |
| Ever                   | 0.90(0.73-1.11)         | 0.327                 |                | 0.88(0.74-1.05)         | 0.165                 |                | 1.13(0.94-1.36)         | 0.203                 |                |

<sup>a</sup> Derived from additive model using logistic regression analysis with an adjustment for age, sex, smoking, drinking status and the top ten principal components;

<sup>b</sup> P for heterogeneity test based on  $\chi^2$ -based Q test.

Supplementary Table 4: The interaction of rs12521436 and rs4912913 with age on gastric cancer risk

| Age                                     | rs12521436 |      |         | Adjusted OR<br>(95%CI) | <i>P</i> <sup>a</sup> | rs4912913                               |      |         | Adjusted OR<br>(95%CI) | <i>P</i> <sup>a</sup> |       |
|-----------------------------------------|------------|------|---------|------------------------|-----------------------|-----------------------------------------|------|---------|------------------------|-----------------------|-------|
|                                         | Genotype   | Case | Control |                        |                       | Genotype                                | Case | Control |                        |                       |       |
| <60                                     | GG         | 147  | 269     | 1.00                   |                       | AA                                      | 218  | 392     | 1.00                   |                       |       |
| <60                                     | GA         | 241  | 389     | 1.18(0.90-1.54)        | 0.230                 | AG                                      | 202  | 352     | 0.98(0.76-1.26)        | 0.860                 |       |
| <60                                     | AA         | 78   | 169     | 0.92(0.65-1.30)        | 0.634                 | GG                                      | 46   | 83      | 1.01(0.67-1.52)        | 0.971                 |       |
| ≥60                                     | GG         | 248  | 306     | 1.50(1.14-1.98)        | 3.39×10 <sup>-3</sup> | AA                                      | 267  | 498     | 0.93(0.73-1.17)        | 0.514                 |       |
| ≥60                                     | GA         | 301  | 492     | 1.15(0.89-1.49)        | 0.282                 | AG                                      | 297  | 440     | 1.20(0.95-1.51)        | 0.124                 |       |
| ≥60                                     | AA         | 98   | 223     | 0.85(0.61-1.17)        | 0.32                  | GG                                      | 83   | 83      | 1.74(1.21-2.49)        | 2.80×10 <sup>-3</sup> |       |
| <i>P</i> for multiplicative interaction |            |      |         |                        | 0.018                 | <i>P</i> for multiplicative interaction |      |         |                        |                       | 0.013 |

<sup>a</sup> *P* value of interaction analysis on gastric cancer risk with adjustment for sex, smoking, drinking status and the top ten principal components.

**Supplementary Table 5: Functional annotation for rs33388, rs12521436, rs4912913 and those with strong linkage disequilibrium with these SNPs in HaploRegV3**

See Supplementary file 1

**Supplementary Table 6: Linkage disequilibrium ( $r^2$  /  $D'$ ) information of the three SNPs**

| SNPs       | rs33388    | rs12521436 | rs4912913  |
|------------|------------|------------|------------|
| rs33388    | -          | 0.01(0.19) | 0(0.01)    |
| rs12521436 | 0.01(0.19) | -          | 0.35(0.99) |
| rs4912913  | 0(0.01)    | 0.35(0.99) | -          |
